# Supplementary material for: Halofuginone inhibits phosphorylation of SMAD-2 reducing angiogenesis and leukemia burden in an acute promyelocytic leukemia mouse model
Source: Springer Nature journal article supplement (doi:10.1186/s13046-015-0181-2), 2015-06-22
Supplement: MOESM3 [file 9777924]

## Supplementary Figure - S1

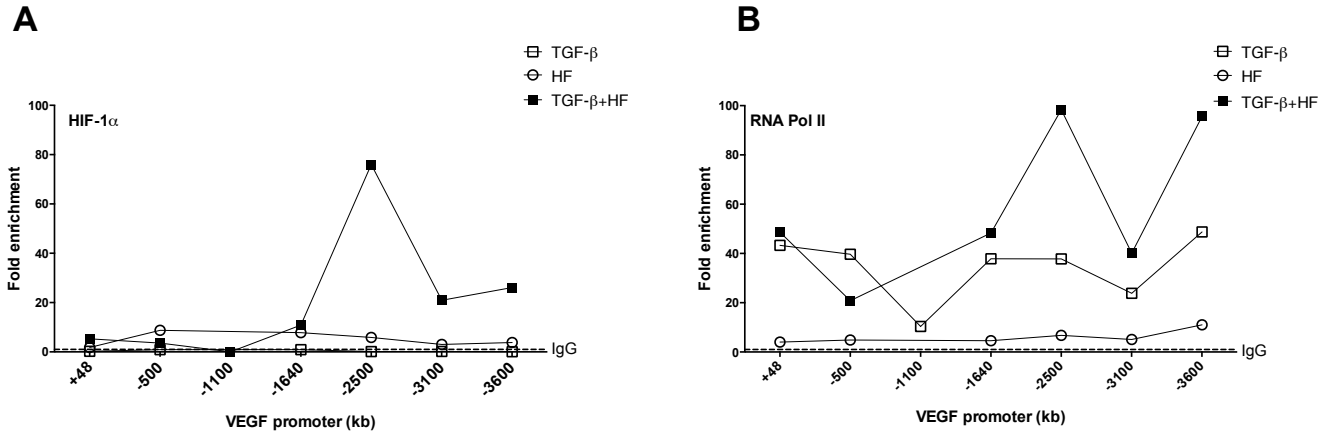

**Figure S1** - ChIP assay using antibodies to RNA Polymerase II, Smad2/3, P-Smad2 and HIF-1 $\alpha$ . NB4 cells were treated with 200 ng/mL of HF for 6 hours, or treated with 200 ng/mL of HF for 6 hours and stimulated with TGF- $\beta$  (1ng/mL) in the last hour, or only stimulated with TGF- $\beta$ . Graphics showing a PCR amplification of ChIP products for (A) HIF-1 $\alpha$  and (B) RNA Polymerase II antibodies using a series of primer pairs covering the *Vegf* promoter. Data is represented as fold enrichment to IgG control antibody.
